# Supplementary material for: Cigarette smoke-associated inflammation impairs bone remodeling through NFκB activation
Source: PubMed Central journal article supplement (PMC8061040; doi:10.1186/s12967-021-02836-z), 2021-04-21
Supplement: 12967_2021_2836_MOESM1_ESM.pdf [file 12967_2021_2836_MOESM1_ESM.pdf]

Figure S1

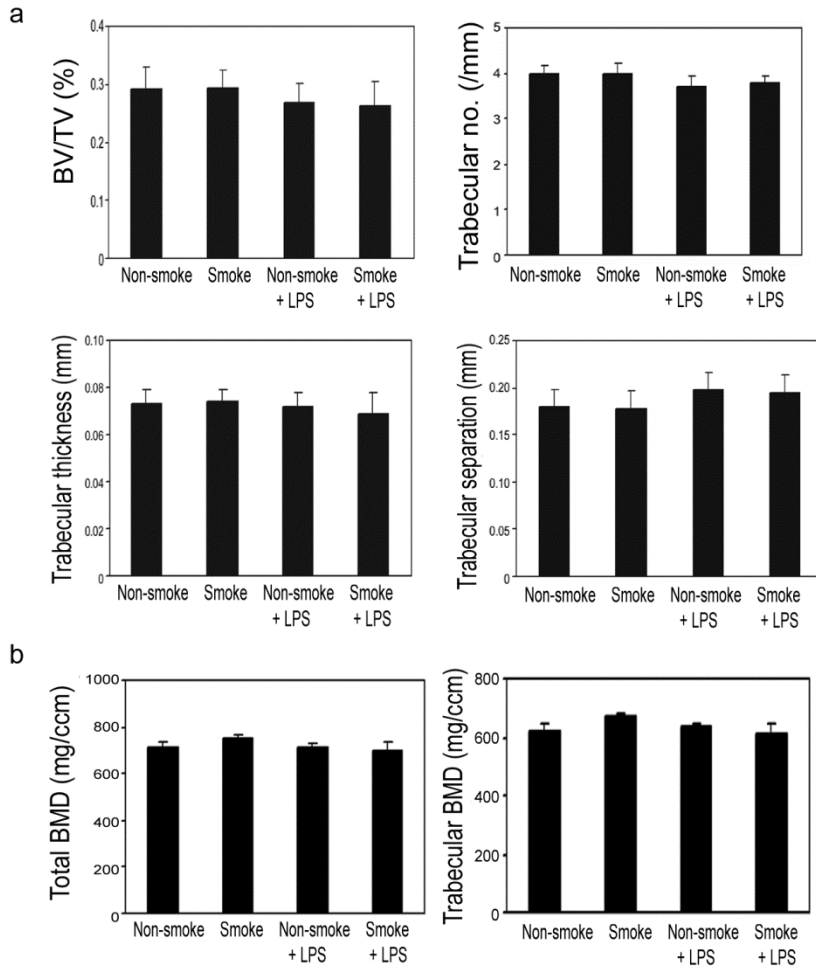

**Fig. S1 Ten-day smoke exposure did not significantly alter the bone structure *in vivo*.** a The parameters of bone phenotypes were measured by microCT in L5. b Bone mineral density (BMD) was determined by pQCT in the tibiae.
